# Supplementary material for: Predictors of in-hospital mortality among patients with pulmonary tuberculosis: a protocol of systematic review and meta-analysis of observational studies
Source: PubMed Central journal article supplement — BMJ Open. 2016 Nov 24;6(11):e011957. doi: 10.1136/bmjopen-2016-011957 (PMC5168525; doi:10.1136/bmjopen-2016-011957), 2016-11-24
Supplement: bmjopen-2016-011957supp_appendix.pdf [file bmjopen-2016-011957supp_appendix.pdf]

## Appendix 1: Proposed search strategy for MEDLINE, EMBASE and Global Health

Database: Ovid MEDLINE(R) In-Process & Other Non-Indexed Citations, Ovid MEDLINE(R) Daily and Ovid MEDLINE(R) <1946 to Present>

Search Strategy:

- 
- 1 tuberculosis/ or exp tuberculosis, pulmonary/ (120663)
  - 2 tuberc\*.mp. (232310)
  - 3 1 or 2 (232668)
  - 4 exp Hospitalization/ (168145)
  - 5 in-hospital.mp. (56173)
  - 6 hospitalization.mp. (137044)
  - 7 hospitalized.mp. (72827)
  - 8 or/4-7 (306697)
  - 9 3 and 8 (3597)
  - 10 mortality/ or hospital mortality/ (60707)
  - 11 mortalit\*.mp. (537083)
  - 12 10 or 11 (537083)
  - 13 9 and 12 (585)
  - 14 "Treatment outcome of new smear positive pulmonary tuberculosis patients in Penang, Malaysia".fc\_titl. (1)
  - 15 "Predictive factors for mortality among non-HIV-infected patients with pulmonary tuberculosis and respiratory failure".fc\_titl. (1)
  - 16 "Hospitalizations for Tuberculosis in the United States in 2000".fc\_titl. (1)
  - 17 "Initial presentations predict mortality in pulmonary tuberculosis patients".fc\_titl. (1)
  - 18 "Risk factors related with mortality in patient with pulmonary tuberculosis".fc\_titl. (1)
  - 19 "Factors associated with mortality in hospitalized patients with newly diagnosed tuberculosis".fc\_titl. (1)
  - 20 "High mortality in adults hospitalized for active tuberculosis in a low HIV prevalence setting".fc\_titl. (1)
  - 21 "Mortality of Patients Hospitalized for Active Tuberculosis in Israel".fc\_titl. (1)
  - 22 "Prognostic factors in tuberculosis related mortalities in hospitalized patients".fc\_titl. (1)
  - 23 "Factors associated with mortality in tuberculosis patients".fc\_titl. (1)

24 or/14-23 (10)

25 13 and 24 (8)

26 24 not 25 (2)

EMBASE

Database: Embase <1974 to 2014 November 25>

Search Strategy:

-----  
1 tuberculosis/ or lung tuberculosis/ (158425)

2 tubercul\*.mp. (259935)

3 1 or 2 (259935)

4 hospitalization/ or hospitalization.mp. (268589)

5 hospitalized.mp. (93919)

6 in-hospital.mp. (80244)

7 or/4-6 (390925)

8 3 and 7 (5236)

9 mortality/ (537684)

10 mortalit\*.mp. (919964)

11 9 or 10 (919964)

12 8 and 11 (1082)

Global Health

Database: Global Health <1973 to 2014 Week 46>

Search Strategy:

-----  
1 "Treatment outcome of new smear positive pulmonary tuberculosis patients in Penang, Malaysia".fc\_titl. (1)

2 "Predictive factors for mortality among non-HIV-infected patients with pulmonary tuberculosis and respiratory failure".fc\_titl. (1)

3 "Hospitalizations for Tuberculosis in the United States in 2000".fc\_titl. (0)

4 "Initial presentations predict mortality in pulmonary tuberculosis patients".fc\_titl. (1)

5 "Risk factors related with mortality in patient with pulmonary tuberculosis".fc\_titl. (0)

6 "Factors associated with mortality in hospitalized patients with newly diagnosed tuberculosis".fc\_titl. (1)

7 "High mortality in adults hospitalized for active tuberculosis in a low HIV prevalence setting".fc\_titl. (1)

8 "Mortality of Patients Hospitalized for Active Tuberculosis in Israel".fc\_titl. (0)

9 "Prognostic factors in tuberculosis related mortalities in hospitalized patients".fc\_titl. (0)

10 "Factors associated with mortality in tuberculosis patients".fc\_titl. (0)

11 or/1-10 (5)

12 exp tuberculosis/ (33746)

13 tubercul\*.mp. [mp=abstract, title, original title, broad terms, heading words, identifiers, cabicodes] (44028)

14 12 or 13 (44028)

15 hospital admission/ or hospital care/ or hospital stay/ (5944)

16 hospitalized.mp. (18553)

17 hospitalization.mp. (14788)

18 in-hospital.mp. (9822)

19 or/15-18 (40604)

20 14 and 19 (1212)

21 hospital\*.mp. (170115)

22 19 or 21 (170115)

23 14 and 22 (6555)

24 mortality/ (61921)

25 mortalit\*.mp. [mp=abstract, title, original title, broad terms, heading words, identifiers, cabicodes] (113527)

26 24 or 25 (113527)

27 20 and 26 (340)

28 23 and 26 (1029)
